# Supplementary material
Source: PubMed Central journal article supplement (PMC1236978)

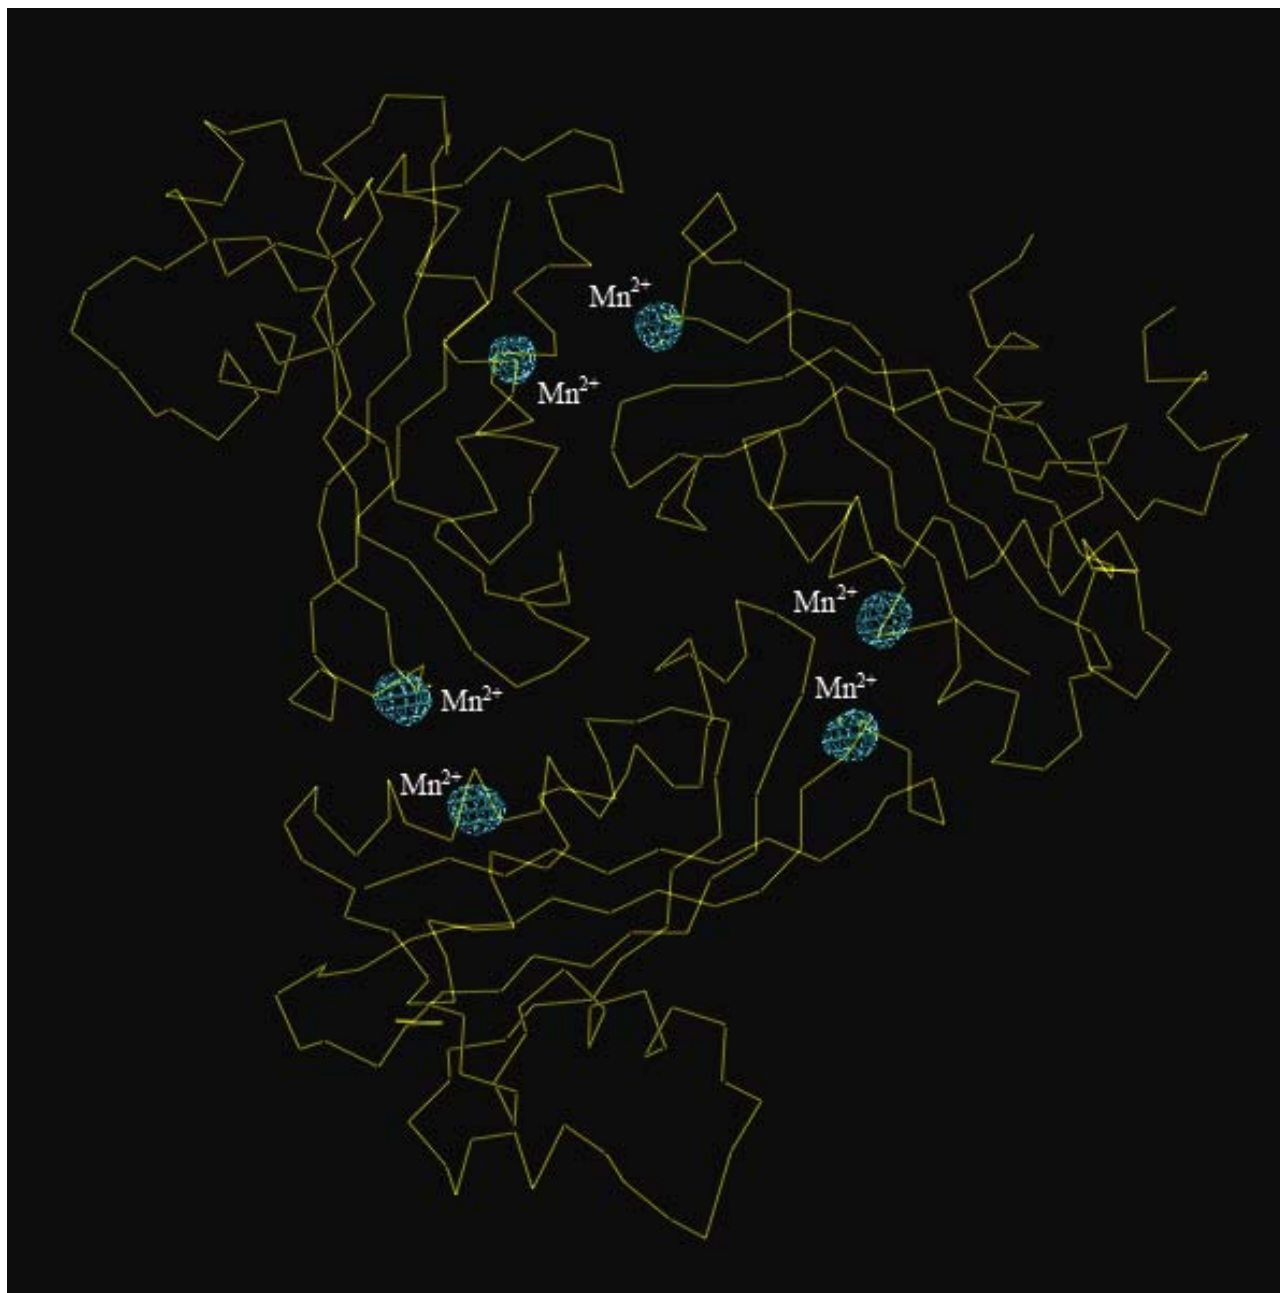

Supplementary Fig. 1

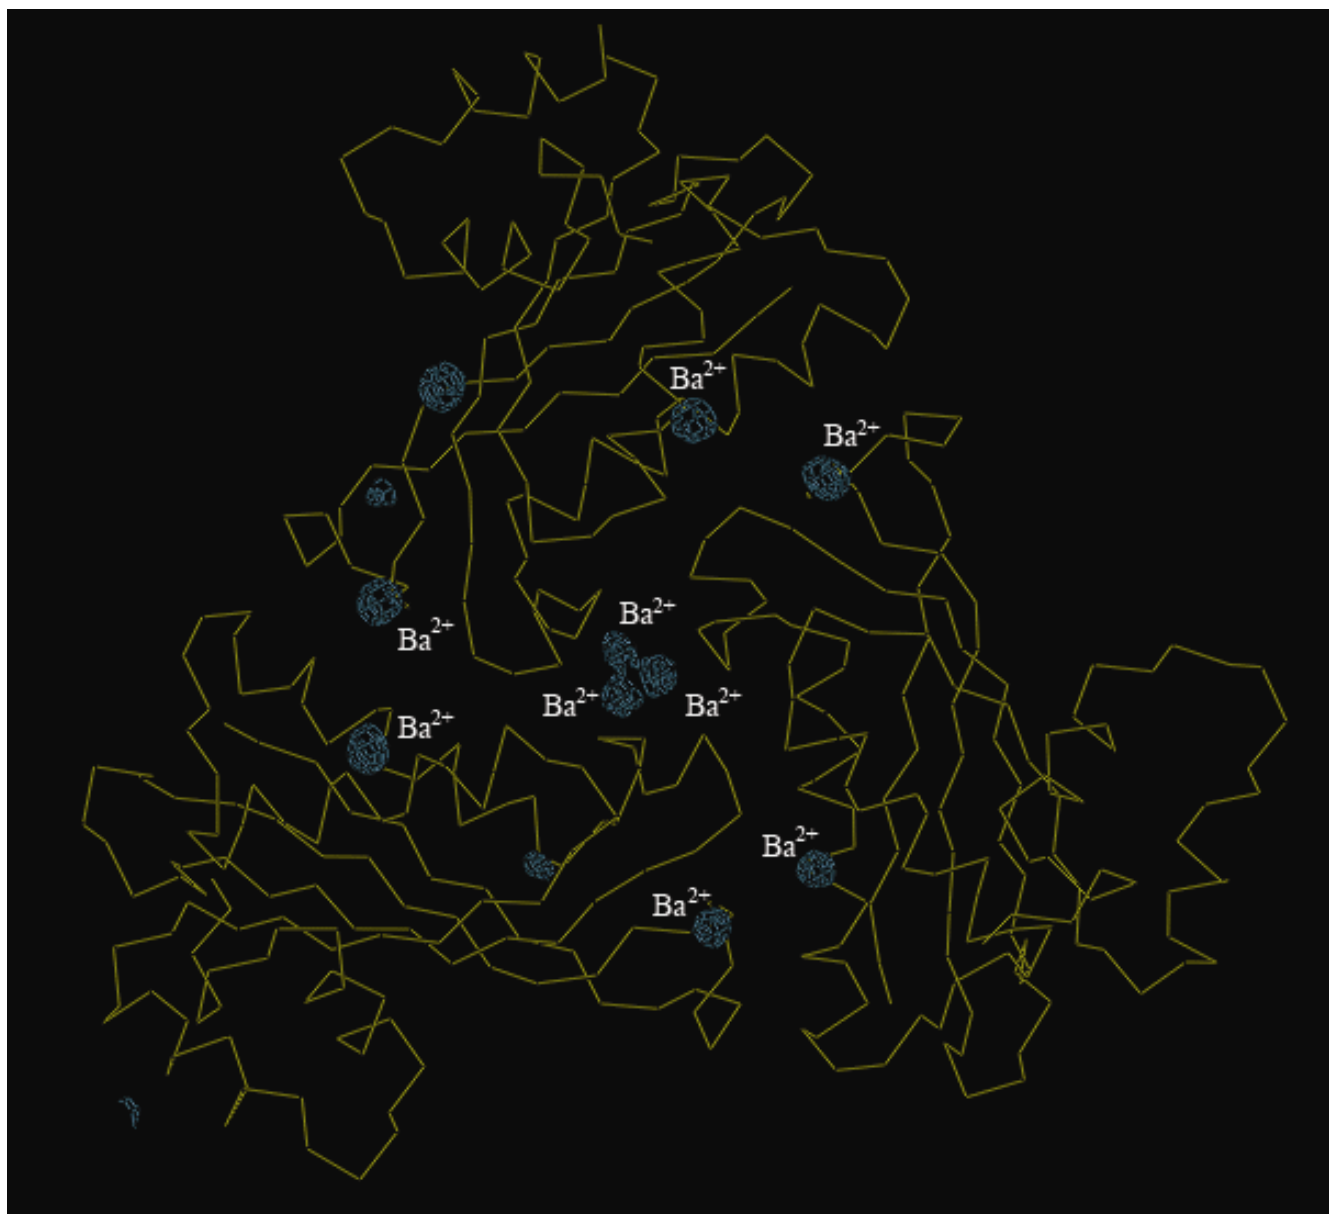

Supplementary Fig. 2

Supplement: nar_33_17_5494__1.pdf [file nar_33_17_5494__1.pdf]
